# Supplementary material for: Dual targeting of histone deacetylases and MYC as potential treatment strategy for H3-K27M pediatric gliomas
Source: eLife. 2024 Aug 2;13:RP96257. doi: 10.7554/eLife.96257 (PMC11296706; doi:10.7554/eLife.96257)
Supplement: Supplementary file 1. — Related to Figure 2G. [file elife-96257-supp1.xlsx]

## Sheet: S1_All_treatments_clusters
Table S1: DESeq_All_treatments_clusters
	Cluster number for DE genes
AARS1	1
AC005261.1	1
AC006538.1	1
AC009404.1	1
AC009955.4	1
AC010326.4	1
AC020910.5	1
AC093752.1	1
AC104041.1	1
AC106795.1	1
AC131009.2	1
ACBD3	1
ACP5	1
ADIPOR1	1
ADM2	1
AGER	1
AKNA	1
AL359764.2	1
AL365203.2	1
AL596244.1	1
ALDH1L2	1
ALG13	1
ALG2	1
ANKMY1	1
ANKRD65	1
AP5Z1	1
APOD	1
APOL2	1
ARF4	1
ARFGEF2	1
ARFIP2	1
ARL1	1
ASIC4	1
ASPM	1
ATAD3A	1
ATF3	1
ATF4	1
ATF5	1
ATF6	1
ATP1A2	1
AZGP1	1
BEST1	1
BET1L	1
BEX2	1
BORA	1
BRF2	1
BST2	1
BTN3A3	1
C16orf58	1
C1QL2	1
C1S	1
CA14	1
CAPS	1
CARS1	1
CCNG1	1
CCNT1	1
CCZ1	1
CDC42EP5	1
CDCA5	1
CEBPB	1
CENPJ	1
CHAC1	1
CHADL	1
CLDN3	1
CNOT2	1
CNTD2	1
COG5	1
COG6	1
COL11A2	1
COL12A1	1
COL15A1	1
COL20A1	1
COL2A1	1
COL9A1	1
COPA	1
COPB1	1
COPB2	1
COPG1	1
COQ10A	1
CRABP2	1
CREB3	1
CUL4B	1
CYB561D2	1
DCAF1	1
DCTN4	1
DDR2	1
DERL1	1
DHRS2	1
DNAJC10	1
DNHD1	1
DNTTIP1	1
DPH2	1
DPH7	1
DPP9	1
DUTP6	1
EBLN3P	1
EDEM3	1
EEF1A1P24	1
EEF1AKMT4	1
EHD4	1
EIF2AK3	1
EIF2S2	1
EIF4A2	1
ELMO3	1
FAM160A2	1
FAM229A	1
FAM8A1	1
FEM1A	1
FGF21	1
FUCA1	1
GARS1	1
GDF15	1
GFPT1	1
GOLGA3	1
GOLGA5	1
GOLPH3L	1
GOSR1	1
GOSR2	1
GPR107	1
GPT2	1
GRAMD1B	1
GSDMB	1
GTF2F1	1
GZF1	1
HACE1	1
HERPUD1	1
HID1	1
HSD17B6	1
HSPA9	1
HYOU1	1
IARS1	1
IFITM2	1
IFITM3	1
IGDCC4	1
ILDR2	1
INHBE	1
INPP5B	1
ITGA10	1
JDP2	1
JUP	1
KCNK6	1
KDELR2	1
KDELR3	1
KLHDC10	1
L3MBTL2-AS1	1
LCNL1	1
LINC01561	1
LINC01963	1
LONP1	1
MARS1	1
MATN1-AS1	1
MCEE	1
MED14	1
MED8	1
MFSD2A	1
MIR22HG	1
MLXIPL	1
MORN1	1
MSMP	1
MSRA	1
MTHFD1L	1
MTHFD2	1
MTMR9LP	1
MTOR	1
MVP	1
MYDGF	1
MYSM1	1
NADK2	1
NLGN3	1
NOC4L	1
NOL6	1
NPRL2	1
NUDT15	1
NUPR1	1
NXPH4	1
NYNRIN	1
OSBP	1
OSBPL2	1
PCK2	1
PCNX3	1
PES1	1
PGM3	1
PHGDH	1
PHLDB3	1
PIP5K1A	1
PLPP5	1
PLXDC1	1
PMM2	1
POFUT2	1
POLR2C	1
POLR3D	1
PPP1R15B	1
PPP1R16A	1
PPP1R1A	1
PPP1R32	1
PPP2R5B	1
PROM1	1
PSAT1	1
PSMC4	1
PSPN	1
PTPRJ	1
RAB3GAP2	1
RCN1	1
RELB	1
RINT1	1
RLBP1	1
RNF112	1
RPL22L1	1
RPLP0P6	1
RPS6KC1	1
RYR1	1
SAR1B	1
SDCBP2	1
SEC13	1
SEC16A	1
SEC22B	1
SEC23A	1
SEC23IP	1
SEC24A	1
SEC24D	1
SEC31A	1
SEC61A1	1
SEC61G	1
SERP1	1
SERPINH1	1
SESN2	1
SEZ6L2	1
SH2D3C	1
SH3BP5-AS1	1
SHMT2	1
SIRT5	1
SKIV2L	1
SLC1A5	1
SLC30A5	1
SLC31A1	1
SLC35A2	1
SLC35E1	1
SLC35F6	1
SLC6A9	1
SLC7A11	1
SLC7A5	1
SMIM40	1
SMOC1	1
SMYD5	1
SNPH	1
SNX19	1
SPINT2	1
SPSB3	1
SPTY2D1	1
SRA1	1
SRP54	1
SRPRA	1
SYVN1	1
TCEAL5	1
TEKT4P2	1
TGDS	1
TGFA	1
TM6SF1	1
TMEM104	1
TMEM130	1
TMEM135	1
TMEM214	1
TMEM225B	1
TMEM62	1
TMF1	1
TNFRSF1A	1
TNR	1
TOPBP1	1
TRIB3	1
TRMT1	1
TRMT2A	1
TTC25	1
TXNDC11	1
UFM1	1
UGGT2	1
USP11	1
VLDLR	1
VLDLR-AS1	1
VMP1	1
VPS53	1
WARS1	1
WDR46	1
WDR90	1
XBP1	1
YIF1A	1
YIPF2	1
ZCCHC7	1
ZDHHC24	1
ZMYND10	1
ZNF10	1
ZNF131	1
ZNF134	1
ZNF275	1
ZNF417	1
ZNF598	1
ZNF815P	1
ZSWIM8	1
AC008115.3	2
AC010319.3	2
AC010331.1	2
AC010624.5	2
AC010997.5	2
AC013394.1	2
AC015912.3	2
AC020765.2	2
AC025164.2	2
AC026979.2	2
AC092171.4	2
AC093635.1	2
AC113410.4	2
AC132192.2	2
AL133477.1	2
AL590326.1	2
ANKRD37	2
AP001437.1	2
BHLHE40	2
C11orf96	2
CADM2	2
CAHM	2
CAMTA1-DT	2
CASZ1	2
CCN1	2
CDKN1A	2
CDKN1C	2
CFD	2
CIART	2
CITED2	2
COA6-AS1	2
DDN-AS1	2
DUSP1	2
EGR1	2
EIF1AXP1	2
FBXO32	2
FIBCD1	2
FNIP1	2
FOS	2
G0S2	2
GADD45B	2
GADD45G	2
H1-0	2
H1-2	2
H2AC17	2
H2AC6	2
H2AC8	2
H2BC11	2
H2BC18	2
H2BC20P	2
H2BC21	2
H2BC5	2
H2BC6	2
H2BC8	2
H2BC9	2
H2BU1	2
H3-3B	2
H3C10	2
H3C3	2
H4C11	2
H4C12	2
H4C5	2
HES5	2
HEXIM1	2
HSPA1A	2
HSPA1B	2
HSPA6	2
KISS1R	2
LINC-PINT	2
LINC01023	2
MAB21L1	2
NEDD4L	2
NEFL	2
NEFM	2
PARD6G-AS1	2
PCAT19	2
PCDH10	2
PCF11	2
PDP1	2
RGS2	2
RN7SL1	2
RPL29P14	2
SMIM24	2
SNORD3A	2
SPATA1	2
SREBF2-AS1	2
TAC3	2
TINCR	2
TJP3	2
TNIK	2
UQCRHL	2
VGLL2	2
YTHDF3-AS1	2
AC006064.4	3
AC012146.1	3
AC046185.3	3
AC073508.3	3
AC078817.1	3
AC079250.1	3
AC090517.5	3
AL049840.6	3
AL391261.3	3
ARHGAP5-AS1	3
ATOX1	3
BID	3
CNIH3-AS2	3
CYB5D2	3
DERA	3
DIPK1A	3
EGF	3
EPHX1	3
FTH1P11	3
FTH1P20	3
FUOM	3
G6PD	3
GABRA3	3
GAP43	3
GLMP	3
GPNMB	3
GSTP1	3
HSPB3	3
IGFBP7	3
IRX4-AS1	3
KCNIP2	3
LINC01563	3
MAN1B1-DT	3
MC4R	3
MGST1	3
MIF-AS1	3
MMP17	3
MRO	3
MST1	3
MT-RNR1	3
MYEOV	3
NIT2	3
NQO1	3
OSGIN1	3
PHF19	3
PIR	3
PRDX1	3
PRR16	3
RAB32	3
RPL5P12	3
RPL5P28	3
RPL5P34	3
RPRML	3
S100B	3
SAT1	3
SPP1	3
STN1	3
SUSD1	3
TIMM8A	3
TIMM8B	3
TM4SF1	3
TRIM16L	3
TXN	3
TXNRD1	3
UPP1	3
AC002456.1	4
AC004540.2	4
AC005076.2	4
AC007009.1	4
AC008443.5	4
AC010913.1	4
AC012368.1	4
AC023983.2	4
AC024940.3	4
AC027031.2	4
AC027644.3	4
AC072054.1	4
AC087239.1	4
AC090617.10	4
AC091271.1	4
AC098487.1	4
AC104619.1	4
AC106800.1	4
AC126175.2	4
AC135050.7	4
AC144652.1	4
AC234582.1	4
AC245884.9	4
ADGRV1	4
ADM	4
AF274858.1	4
AKR1C1	4
AKR1C3	4
AL031729.1	4
AL031847.2	4
AL034430.1	4
AL109918.1	4
AL139100.2	4
AL160254.1	4
AL390719.1	4
AL391684.1	4
AL450311.1	4
AL450405.1	4
AP000354.1	4
AP000769.1	4
AP001462.1	4
AP002360.2	4
AP1S3	4
ARHGAP19-SLIT1	4
ARHGAP42	4
ATOH8	4
ATP2A1-AS1	4
BAALC	4
BLVRB	4
BMF	4
C4orf19	4
C4orf3	4
CADM3	4
CAV1	4
CAV2	4
CCDC167	4
CELF3	4
CEMIP2	4
CLN6	4
CNTNAP4	4
CRYAB	4
CSKMT	4
DNAAF3	4
DOK5	4
EGLN3	4
EGR2	4
ERV3-1	4
EXOC3-AS1	4
FAH	4
FAM133DP	4
FAM210B	4
FBXO44	4
H2AJ	4
H3-3A	4
HAGLR	4
HCFC1R1	4
HDAC4-AS1	4
HECTD2	4
HES1	4
HES4	4
HEY1	4
HMOX1	4
HS3ST3A1	4
ID1	4
ID2	4
ID3	4
IFI6	4
KLHDC8A	4
KPNA4	4
LAMP5	4
LAYN	4
LFNG	4
LGALS3	4
LINC00476	4
LINC01315	4
LINC02762	4
LMO1	4
LNPK	4
MADCAM1	4
MIR210HG	4
MMP9	4
MT2A	4
MT3	4
NES	4
NHP2P1	4
NMNAT3	4
NOVA1	4
NPTN-IT1	4
NPTX1	4
NPTX2	4
NR1D1	4
NRGN	4
OXR1	4
PCDH18	4
PCLAF	4
PCSK1N	4
PDE2A	4
PER3	4
PGM2L1	4
PIK3CD-AS2	4
PKIA	4
PMEL	4
PON2	4
PRR34-AS1	4
PXN-AS1	4
PYGL	4
RIMS2	4
RIT2	4
RNPC3	4
RPL4P2	4
RXRA	4
S100A10	4
S1PR3	4
SAMD5	4
SCG2	4
SCRT1	4
SERBP1P5	4
SERBP1P6	4
SERPINI1	4
SLC31A2	4
SNCB	4
SNHG4	4
SORD	4
SP110	4
SPARCL1	4
SPRY1	4
SRGAP1	4
SRP14-AS1	4
STMN2	4
STUM	4
SVIP	4
SYT4	4
TEAD2	4
THSD7A	4
TMEFF2	4
TMEM44-AS1	4
TMEM63A	4
TNFAIP8L1	4
TNNI3	4
TRPM4	4
YBX1P10	4
Z99774.4	4
ZNF337-AS1	4
ZNF583	4
ZSCAN16-AS1	4
