# Supplementary material for: Dual targeting of histone deacetylases and MYC as potential treatment strategy for H3-K27M pediatric gliomas
Source: eLife. 2024 Aug 2;13:RP96257. doi: 10.7554/eLife.96257 (PMC11296706; doi:10.7554/eLife.96257)
Supplement: Supplementary file 3. — (a) Summary information of MARS-seq libraries. (b) Summary information of Cut&Run libraries. [file elife-96257-supp3.xlsx]

## Sheet: S3a-MARS-seq libraries
Table S3a: Summary tables of MARS-seq libraries
MARS-SEQ - Sulfopin-12h
Cell line	Replicate	Treatment	No. of reads (total)	No. of Uniquely mapped reads	% of Uniquely mapped reads	No. of reads uniquely mapped to genes	No. of reads after UMI correction
SU-DIPG13	Sulfo1	10uM Sulfopin, 12h	6975421	4880454	69.9664	3694276	1081162
SU-DIPG13	Sulfo2	10uM Sulfopin, 12h	13721124	9671167	70.4838	7607738	2224616
SU-DIPG13	Sulfo3	10uM Sulfopin, 12h	8027407	5646506	70.3403	4326486	1311401
SU-DIPG13	DMSO2	DMSO	13069448	9064941	69.3598	6800365	2093607
SU-DIPG13	DMSO3	DMSO	20085351	14021521	69.8097	10609816	3126178
MARS-SEQ-All treatments
Cell line	Replicate	Treatment	No. of reads (total)	No. of Uniquely mapped reads	% of Uniquely mapped reads	No. of reads uniquely mapped to genes	No. of reads after UMI correction
SU-DIPG13	DMSO3	DMSO	23852727	16432842	68.8929	12849023	2695715
SU-DIPG13	DMSO2	DMSO	16945164	11479427	67.7446	8828827	1994912
SU-DIPG13	DMSO1	DMSO	23533176	16317266	69.3373	12690676	2628573
SU-DIPG13	Sulfo1	10uM Sulfopin, 8d	24218948	16622142	68.6328	12251374	2091294
SU-DIPG13	Sulfo3	10uM Sulfopin, 8d	21549703	14764317	68.5129	11469723	2023347
SU-DIPG13	Sulfo2	10uM Sulfopin, 8d	15433742	10413343	67.4713	7927042	1480863
SU-DIPG13	SulfoVorino2	10uM Sulfopin, 8d+ 1uM Vorinostat, 72h	13599813	9330780	68.6096	7186364	1285990
SU-DIPG13	SulfoVorino3	10uM Sulfopin, 8d+ 1uM Vorinostat, 72h	18471299	12673402	68.6113	9651915	1686199
SU-DIPG13	SulfoVorino1	10uM Sulfopin, 8d+ 1uM Vorinostat, 72h	21532850	14755862	68.5272	11299417	1929525
SU-DIPG13	Vorino2	1uM Vorinostat, 72h	21583268	14799173	68.5678	11324609	2415977
SU-DIPG13	Vorino3	1uM Vorinostat, 72h	18216491	12415806	68.157	9111036	2000337
SU-DIPG13	Vorino1	1uM Vorinostat, 72h	15621228	10711773	68.5719	8020964	1692080

## Sheet: S3b-Cut&Run libraries
Table S3b: Summary table of Cut&Run libraries
Cell line	Sample	Treatment	Antibody	No. of uniquely mapped paired-end reads	% Uniquely and concordantly aligned reads	No. of broad Peaks (against HRP control)
SU-DIPG13	DMSO_27ac	DMSO	K27ac	7750848	0.835	27346
SU-DIPG13	DMSO_27me3	DMSO	K27me3	9851543	0.7779	19220
SU-DIPG13	Sulfo_27ac	Sulfopin	K27ac	8111774	0.8429	43760
SU-DIPG13	Sulfo_27me3	Sulfopin	K27me3	3941857	0.7548	9644
SU-DIPG13	Vor_Sul_27ac	Vorinostat+Sulfopin	K27ac	7194792	0.8363	28752
SU-DIPG13	Vor_Sul_27me3	Vorinostat+Sulfopin	K27me3	6621253	0.7693	16735
SU-DIPG13	Vorino_27ac	Vorinostat	K27ac	10688627	0.8336	14178
SU-DIPG13	Vorino_27me3	Vorinostat	K27me3	5068775	0.7628	20629
SU-DIPG13	HRP*	N.T	HRP	10022093	0.6754		* Furth et al., 2022; Table S1
